# Supplementary material
Source: PubMed Central journal article supplement (PMC1087959)
Supplement: pnas_102_17_5981__1.pdf [file pnas_102_17_5981__1.pdf]

|                      | 210                                                                                               | 377 | 379 | 387 | 388 | 424 | 425 | 453 | 463 | 519 | 534 | 536 | 552 | 553 | 557 |
|----------------------|---------------------------------------------------------------------------------------------------|-----|-----|-----|-----|-----|-----|-----|-----|-----|-----|-----|-----|-----|-----|
| <i>H. sapiens</i>    | RG..163..GGHRDSW..5..DF..31..SWDAEEFGLLGST..20..DSS-IEGNYTL-R..55..ND..12..GR---ARY..14..YHSVY-ET |     |     |     |     |     |     |     |     |     |     |     |     |     |     |
| <i>S. scrofa</i>     | RG..163..GGHRDSW..5..DF..31..SWDAEEYGLGST..20..DSS-IEGNYTL-R..55..ND..12..GR---ARY..14..YHSVY-ET  |     |     |     |     |     |     |     |     |     |     |     |     |     |     |
| <i>M. musculus</i>   | RG..163..GGHRDAW..5..DF..31..SWDAEEFGLLGST..20..DSS-IEGNYTL-R..55..ND..12..GR---ARY..14..YHSVY-ET |     |     |     |     |     |     |     |     |     |     |     |     |     |     |
| <i>R. norvegicus</i> | RG..163..GGHRDAW..5..DF..31..SWDAEEFGLLGST..20..DSS-IEGNYTL-R..55..ND..12..GR---ARY..14..YHSVY-ET |     |     |     |     |     |     |     |     |     |     |     |     |     |     |
| <i>D. rerio</i>      | RG..162..GGHRDAW..5..DF..31..SWDAEEFGLQGST..20..DCA-IEGMYTL-R..54..SD..12..GR---ARY..14..YHSVY-ET |     |     |     |     |     |     |     |     |     |     |     |     |     |     |
| <i>C. briggsae</i>   | RG..166..GNHFDW..5..DF..32..AWDAEEFGLIGST..20..DCI-QGNAS-L-H..57..SD..12..IN---FNY..11..YHSMY-ET  |     |     |     |     |     |     |     |     |     |     |     |     |     |     |
| <i>A. thaliana</i>   | RG..148..GNHRDAW..5..DF..31..NWDAEEYGLIGST..20..DCA-VSGPG-F-H..48..SD..12..VD---MSF..6..YHSMY-DD  |     |     |     |     |     |     |     |     |     |     |     |     |     |     |
| <i>M. grisea</i>     | RG..166..GNHRDGW..6..DA..31..SWDAEEFGFMGST..20..DTA-VSGPR-T-A..48..SD..11..LD---ISG..10..YHSLY-DT |     |     |     |     |     |     |     |     |     |     |     |     |     |     |
| <i>A. nidulans</i>   | RG..165..GNHRDAW..6..DF..31..SWDGEYGLLGST..20..DVA-ASGTR-L-A..44..SD..12..YD---LGF..10..YHSNY-DS  |     |     |     |     |     |     |     |     |     |     |     |     |     |     |
| <i>N. crassa</i>     | RA..170..GNHRDAW..6..DF..31..SWDGEYGLVGST..20..DVG-VRGKV-F-S..43..SD..12..LD---VGF..10..YHSNY-DS  |     |     |     |     |     |     |     |     |     |     |     |     |     |     |
| <i>G. zeae</i>       | RG..165..GNHRDTW..6..DF..31..SWDAEEWGIIGST..20..DVA-VSGPR-P-N..48..SD..11..LD---TGS..10..YHSNY-DS |     |     |     |     |     |     |     |     |     |     |     |     |     |     |
| NLD2                 | RG..163..GGHRDSW..5..DF..31..SWDAEEFGLLGST..20..DSS-IEGNYTL-R..55..SD..12..GR---ARY..14..YHTIY-ET |     |     |     |     |     |     |     |     |     |     |     |     |     |     |
| NLDL                 | RG..167..GNHRDSW..5..DF..32..SWGAEFGLIGST..20..DIS-VFANATL-R..55..SD..12..MD---IAY..14..YHTAF-DT  |     |     |     |     |     |     |     |     |     |     |     |     |     |     |
| Sgap                 | GAHLDV..7..DN..28..WWGAEEELGLIGSK..20..DMIGS--PNPGYF..32..SD..12..GLFTGAGY..21..YHSSC-DS          |     |     |     |     |     |     |     |     |     |     |     |     |     |     |
| AAP                  | GGHLDST..15..DD..28..AYAAEEVGLRGSQ..19..DMTNYKGSAQDVV..36..SD..12..MPFE----..9..IHTQ-DT           |     |     |     |     |     |     |     |     |     |     |     |     |     |     |
| CPG <sub>2</sub>     | MSHMDTV..24..DD..28..FNTDEEKGSFGSR..16..EPTSAG----DEK..152..TD..11..IE---S---..7..YHSDKAEY        |     |     |     |     |     |     |     |     |     |     |     |     |     |     |
| PepT                 | ISHVDTS..57..DD..27..FTPDEEVGKGAH..14..D--GGG---VGE..153..TD..12..PN-----..7..YHGK-HEF            |     |     |     |     |     |     |     |     |     |     |     |     |     |     |
| PepV                 | IGHMDVV..27..DD..28..LGTNEETNWWGID..15..DAEYPI----I---.232..TY..7..VA---F---.10..MHA-ANEF         |     |     |     |     |     |     |     |     |     |     |     |     |     |     |
| TfR1                 | FA..140..GAQRDAW..5..KS..32..SWSAGDFGSVGAT..20..DKA-VLGTSNF-K..43..NA..12..VS---FCF..8..LGTMT-DT  |     |     |     |     |     |     |     |     |     |     |     |     |     |     |
