# Supplementary material
Source: PubMed Central journal article supplement (PMC1087959)
Supplement: pnas_102_17_5981__2.pdf [file pnas_102_17_5981__2.pdf]

|                      | 60          | 70                 | 80           | 90                           | 100                      | 110                               | 120                 | 130               |
|----------------------|-------------|--------------------|--------------|------------------------------|--------------------------|-----------------------------------|---------------------|-------------------|
| <i>H. sapiens</i>    | HNMKAFLEDEL | KAENIKKFLYNFTQI    | -----        | PHLAGTEQNFQIAKQIQSQWK        | EF                       | GLDSVELAHYDVLLSYPNKTHPNYISIIINE   | -----               | DGN               |
| <i>S. scrofa</i>     | NVKKAFLEDEL | KAENIKKFLYNFTRI    | -----        | PHLAGTEQNFQIAKQIQSQWK        | EF                       | GLDSVELAHYDVLLSYPNKTRPNYISIIIDE   | -----               | DGN               |
| <i>M. musculus</i>   | GMKKEFLHEL  | KAENIKKFLYNFTRT    | -----        | PHLAGTQNNFELAKQIHQDQWK       | EF                       | GLDLVELSHYDVLLSYPNKTHPNYISIIINE   | -----               | DGN               |
| <i>R. norvegicus</i> | GMKKAFLQEL  | KAENIKKFLYNFTRT    | -----        | PHLAGTQHNFELAKQIHAQWK        | EF                       | GLDLVELSDYDVLLSYPNKTHPNYISIIINE   | -----               | DGN               |
| <i>D. rerio</i>      | SFLRDFMDEM  | HAENIKKHHLRKFTEL   | -----        | PHLAGTQONLNLAEQIRNEWM        | EF                       | GLDSVELVPYDVLLSYPNKTHPNYISIVDQ    | -----               | LGN               |
| <i>C. briggsae</i>   | TDAKTIQDNI  | KSENIKKYLRIFTQE    | -----        | PHIAGTDANKKVAYAIASAWT        | EA                       | GLEDEVHTLPYEVLLSYPDFENPNVSVVIONS  | -----               | AGK               |
| <i>A. thaliana</i>   | HYHELFI     | ISTSFSDNASVALNLHTL | TRR          | PHVAGTVANAEAAEYVRSVFT        | SS                       | ALKSHVVAYQVSLTYPVHRSLVLTPTDS      | -----               | -----             |
| <i>M. grisea</i>     | ETERTLVDSF  | DNSSIAEWSYYYSSG    | -----        | MRLAG--SNRSQAEWTROMWQ        | DA                       | GLE-VQIAEYWITYTEPSESSLRLRRPDG     | -----               | -----             |
| <i>A. nidulans</i>   | ELQTLLEGTP  | SAARAREWSKYYS      | TSG          | PHLTG--KNLSQALWTKERWE        | EF                       | GIADTKIATYDVYLNYPDLHRLALYQGGN     | -----               | -----             |
| <i>N. crassa</i>     | HLRQLLDTP   | SSKKAEEWQRYT       | TAG          | PHLAG--KNYSQALWTKKEWE        | EF                       | GVQSHIVDYEVYINYPVDHRLALLNKEDKKNDS | SSSD                | NW                |
| <i>G. zeae</i>       | DQETILVNAF  | DNSSIDEWSDYYGHQ    | -----        | NKLAG--QGKEAAQWTADRWT        | ES                       | GFE-SHLAEYHVFLRYPVSSSLHVT         | SANG                | -----             |
| NLD2                 | SIRWKLVS    | EM--KAENIKSFLRS    | FTKL         | PHLAGTEQNFLLAKKIQTQWK        | KF                       | GLDSAKLVHYDVLLSYPNETNANYISIVDE    | -----               | HET               |
| NLDL                 | EILETVMGQI  | DAHRIREN           | RELSRE       | PHLASSPRDELVQLLLQRWKDPE      | ---                      | GLDSAKLVHYDVLLSYPNETNANYISIVDE    | -----               | HET               |
| Sgap                 | -----APD    | I--PLANVKAHLTQ     | LS           | TAAANNNGNRAHGRPGYKASVDYVKA   | LD                       | AA-SGLDSAEAXTYEVLLSFP             | SQEQPNVVD           | I                 |
| AAP                  | ATVTAWLPQV  | DASQITGT           | ISSLESF      | TNRFYTTTSGAQASDWIAS          | EWQ                      | ALG--Y-TTTLQOFTSG                 | -----               | -----             |
| Tfr1                 | RKLSEKLD    | ST--DFTSTIKLL      | NENSYV       | PREAGSOKDENLALYVENEFR        | EF                       | KLSKVWRDQHFVKIQVKDSAQNSVI         | I                   | V                 |
| Tfr2                 | AMFLQFLGEG  | --RLED             | TIR---       | QTSLR-----ERVAGSAGMAALTQD    | IRAALS--                 | RQ--KLDHVWTDTHYVGLQFP             | DP                  | PAHPNTLHWVDE      |
|                      | 140         | 150                | 160          | 170                          | 180                      | 190                               | 200                 | 210               |
| <i>H. sapiens</i>    | E-IFNTSLF   | EPPPP---           | PGYENVSD-    | IVPPFSAFSPQGMPEGDLVYVNYARTED | FFKLERDMKINCSGKIV        | IARYGKVF                          | FRGNKVKNAQLAGAKG    | VILYSDP           |
| <i>S. scrofa</i>     | E-IFNTSLF   | EPPPP---           | PGYENVSD-    | VVPPFSAFSPQGMPEGDLVYVNYARTED | FFKLERDMKINCSGKIL        | IARYGKIF                          | FRGNKVKNAQLAGAKGI   | IILYSDP           |
| <i>M. musculus</i>   | E-IFKTSLS   | EQPP---            | PGYENISD-    | VVPPYSAFSPQGTPEQDLVYVNYARTED | FFKLEREMKISCSGKIV        | IARYGKVF                          | FRGNMVKNVQLAGAKGM   | IILYSDP           |
| <i>R. norvegicus</i> | E-IFKTSLS   | LAELSP---          | PGYENISD-    | VVPPYSAFSPQGTPEQDLVYVNYARTED | FFKLERVMKINCSGKIV        | IARYGQV                           | FRGNKVKNAQLAGAKGI   | IILYSDP           |
| <i>D. rerio</i>      | E-IFKTSLS   | LAEPVP---          | EGYEDVAD-    | IVPPYSAFSAKQPEDELVYVNYARTED  | FFKLERELGINCTGKIL        | IARYGKIF                          | FRGNKVKNAVLAGAKGI   | IILFSDP           |
| <i>C. briggsae</i>   | E-IFRSKGV   | SPVIIPDEQSG--      | KY-AGHQWL    | AYGGNGTVSADVVYINRGNANDFK     | NLK-LMGVDVKGKIALMRYGHG   | FRGDKVYKAQ                        | QAGAILFSDT          | -----             |
| <i>A. thaliana</i>   | --AKPITFL   | LEQEKLGDN          | PYAN--       | VMPTFHGYAKSGNVSGPVVYANYGR    | VEDFVRLKKDMGVNVSGAVVI    | ARYGQIYR                          | GDIVKNAYEAGAVGV     | VIYTDK            |
| <i>M. grisea</i>     | --SSHVAQL   | REDV-LEGDEQ        | TANPD-EKIAFH | ALSGSGNVSAEYIYVGRGTRGDY      | KRLV-DLGVDLKGI           | IALAQYGGTNR                       | GVKIKNAQENGMVGT     | VLYTDP            |
| <i>A. nidulans</i>   | -ISYEASL    | EEDV-LEEDST        | SGLPD-RVPTFH | GYASAGNVTSASFVFNFGTYAD       | FEDLV-NANVSLSGKIAIAKYGR  | VFRGLKVKRAQELGMVGV                | VLYDDP              | -----             |
| <i>N. crassa</i>     | QVSFEATL    | EEDI-LDEDP         | STSLPD-RVPV  | FHGYASAGNVTA                 | PVVYVNYGTYQDFEDLL-KANVSL | AGKIAIARYGLIFRGLKVKRAQELGMIGVI    | I                   | IFTDP             |
| <i>G. zeae</i>       | -TTSEINIK   | EDV-LPEDDV         | TNRTEISQ     | TFLAYAPGGNASAEYVYAGRGS       | IDDFDRLV-ELGVEVKGKIALIKY | GGLFRGLKVKNAQDHGAIGAVI            | FIDP                | -----             |
| NLD2                 | E-IFKTSY    | LEPPP---           | DGYENVTN-    | IVPPYNAFSAQGMPEGDLVYVNYARTED | FFKLEREMGINCTGKIV        | IARYGKIF                          | FRGNKVKNAMLAGAIGI   | IILYSDP           |
| NLDL                 | E-IFKTSY    | LEPPP---           | DGEQGGPD-    | VVQPYAAYAPS                  | GTPOGLLVYANRGA           | EEDFKELO                          | TQ-GIKLEGTIALTRYGGV | GRGAKAVNAAKHGVAGV |
| Sgap                 | I-IHSCHRT   | EENV---            | TG           | -----                        | -----                    | -----                             | -----               | -----             |
| AAP                  | -----       | -----              | -----        | -----                        | -----                    | -----                             | -----               | -----             |
| Tfr1                 | L-VY---     | LVENP---           | GG           | -----                        | YVAYS                    | KAATVTGKLVHANFGTKKDF              | FEDLY---            | TPVNGS            |
| Tfr2                 | V-GEQLP     | LEDP               | -----        | D-VYCP                       | YSAI---                  | GNVTGELVYAHYGR                    | PEDLO               | DL-RARGVDPVGRLLLV |
|                      | 220         | 230                |              |                              |                          |                                   |                     |                   |

|                      | 240     | 250                  | 260          | 270        | 280             | 290   | 300   | 310          |
|----------------------|---------|----------------------|--------------|------------|-----------------|-------|-------|--------------|
| <i>H. sapiens</i>    | ADY---- | FAPGVKSYPDGWNLPGGGVQ | RGNIILNLN--- | GAGDPLTPGY | PANEYAYRRG----- | I     | A     | EAVGLPSIPVHP |
| <i>S. scrofa</i>     | ADY---- | FAPGVQSYPDGWNLPGGGVQ | RGNIILNLN--- | GAGDPLTPGY | PANEYAYRLQ----- | I     | A     | EAVGLPRIPVHP |
| <i>M. musculus</i>   | ADY---- | FVPGVKSYPDGWNLPGGGVQ | RGNVLNLN---  | GAGDPLTPGY | PANEHAYRHE----- | L     | T     | EAVGLPSIPVHP |
| <i>R. norvegicus</i> | ADY---- | FVPGVKSYPDGWNLPGGGVQ | RGNVLNLN---  | GAGDPLTPGY | PANEYAYRHE----- | F     | T     | EAVGLPSIPVHP |
| <i>D. rerio</i>      | ADY---- | W                    | A            | E          | D               | V     | E     | P            |
| <i>C. briggsae</i>   | SDVAQ-- | D                    | G            | V          | D               | S     | E     | H            |
| <i>A. thaliana</i>   | R       | D                    | Y            | G          | -----           | G     | D     | E            |
| <i>M. grisea</i>     | L       | E                    | D            | G          | Q               | V     | T     | E            |
| <i>A. nidulans</i>   | Q       | T                    | D            | G          | E               | T     | E     | N            |
| <i>N. crassa</i>     | G       | E                    | D            | G          | E               | M     | T     | E            |
| <i>G. zeae</i>       | G       | D                    | D            | G          | N               | M     | T     | A            |
| NLD2                 | ADY---- | F                    | A            | P          | E               | V     | Q     | P            |
| NLDL                 | AD      | I                    | N            | D          | G               | ----- | L     | S            |
| Sgap                 | -----   | -----                | -----        | -----      | -----           | ----- | ----- | -----        |
| Aap                  | -----   | -----                | -----        | -----      | -----           | ----- | ----- | -----        |
| Tfr1                 | T       | K                    | F            | -----      | P               | I     | V     | N            |
| TFR2                 | A       | D                    | F            | -----      | S               | Q     | D     | P            |
|                      | 320     | 330                  | 340          | 350        | 360             | 370   | 380   | 390          |
| <i>H. sapiens</i>    | ---     | S                    | S            | W          | R               | G     | S     | -----        |
| <i>S. scrofa</i>     | ---     | D                    | S            | W          | K               | G     | S     | -----        |
| <i>M. musculus</i>   | ---     | S                    | S            | W          | K               | G     | G     | -----        |
| <i>R. norvegicus</i> | ---     | S                    | S            | W          | K               | G     | G     | -----        |
| <i>D. rerio</i>      | ---     | S                    | W            | K          | G               | A     | ----- |              |
| <i>C. briggsae</i>   | ---     | W                    | Q            | G          | F               | V     | G     | -----        |
| <i>A. thaliana</i>   | ---     | -----                | V            | Y          | P               | V     | G     | P            |
| <i>M. grisea</i>     | A       | N                    | R            | S          | S               | W     | V     | G            |
| <i>A. nidulans</i>   | F       | N                    | E            | -----      | A               | W     | Q     | G            |
| <i>N. crassa</i>     | F       | N                    | K            | -----      | W               | T     | A     | R            |
| <i>G. zeae</i>       | V       | N                    | R            | T          | A               | W     | V     | G            |
| NLD2                 | ---     | K                    | S            | W          | K               | G     | A     | -----        |
| NLDL                 | ---     | A                    | T            | W          | Q               | G     | A     | -----        |
| Sgap                 | -----   | -----                | -----        | -----      | -----           | ----- | ----- | -----        |
| AAP                  | -----   | -----                | -----        | -----      | -----           | ----- | ----- | -----        |
| Tfr1                 | ---     | W                    | K            | T          | D               | S     | T     | -----        |
| TFR2                 | ---     | E                    | -----        | W          | Q               | G     | S     | -----        |



|                      | 560                               | 570                           | 580                       | 590                  | 600                             | 610                 | 620                  |                              |                            |                  |              |
|----------------------|-----------------------------------|-------------------------------|---------------------------|----------------------|---------------------------------|---------------------|----------------------|------------------------------|----------------------------|------------------|--------------|
| <i>H. sapiens</i>    | -YELVEKFYDPMFKYHL                 | -TVAQVRGGMVFELANSIVLPFDCRDYA  | -VVLRYADKIYSISMK          | ----                 | HPQE                            | -----               | -----                |                              |                            |                  |              |
| <i>S. scrofa</i>     | -YELVEKFYDPTFKYHL                 | -AVAQVRGGIVFELANSVVRPFDCRDYA  | -VVLRYADKLYNISMN          | ----                 | HPQE                            | -----               | -----                |                              |                            |                  |              |
| <i>M. musculus</i>   | -YELVVKFYDPTFKYHL                 | -TVAQVRRAMVFELANSIVLPFDCQSYA  | -VALKKYADTIYNISMK         | ----                 | HPQE                            | -----               | -----                |                              |                            |                  |              |
| <i>R. norvegicus</i> | -YELVEKFYDPTFKYHL                 | -TVAQVRGAMVFELANSIVLPFDCQSYA  | -VALKKHAETIYNISMN         | ----                 | HPQE                            | -----               | -----                |                              |                            |                  |              |
| <i>D. rerio</i>      | -YEIVERFYDPRFRRL                  | -AVARVRGGLIFSLADSAVLPDCVEYA   | -TSLSTYANSIHQLAKK         | ----                 | HPEA                            | -----               | -----                |                              |                            |                  |              |
| <i>C. briggsae</i>   | -FTNIHLMDETDLAVHR                 | -AIGQYWAELAKTFADDEVVLPMTTNLAS | -VMIKSYLPQLKASISGI        | ----                 | NVSRIDFESI                      | -----               | -----                |                              |                            |                  |              |
| <i>A. thaliana</i>   | -FTWMEKFGDPMFQRHV                 | -AMASVLGLVALRLADEEIIIPFNYSYA  | -LELKKSAEDLENEKLG         | ----                 | HNID                            | -----               | -----                |                              |                            |                  |              |
| <i>M. grisea</i>     | -YDWMANYADPGFQVHK                 | -AMGQVWVTLMLYHLADDPPIPFDLNAA  | -TTLRALFQDLQDDMAEL        | ----                 | FPTVTDLD                        | -----               | -----                |                              |                            |                  |              |
| <i>A. nidulans</i>   | -FDWMQRFGDPDWLYHE                 | -ACAKIWALAAAKLAETPVLFFNATDYS  | -LGLLEYVDRIRPAADNL        | ----                 | PNGL                            | -----               | -----                |                              |                            |                  |              |
| <i>N. crassa</i>     | -FYWMKKYGDPGFVYHR                 | -TMAQIFGLLIAELAHLPVLAFAESYA   | -TALDGYVTQVEDKLNVAHLHPKKE | ----                 | EEVDISTLTEQVISELRGNHYNSSSSSSTAI | -----               | -----                |                              |                            |                  |              |
| <i>G. zeae</i>       | -YHWMSTLGDPGFHSV                  | -SQGQYLSLLGYHLATDEILPFDTQNYA  | -KELRAYEDLVEFTEG          | ----                 | KDADLD                          | -----               | -----                |                              |                            |                  |              |
| NLD2                 | -FELVEKFYDPTFKKQL                 | -SVAQLRGALVYELVDSKIIPFNIQDYA  | -EALKNYAASLYNLSKK         | ----                 | HDQQ                            | -----               | -----                |                              |                            |                  |              |
| NLDL                 | -FDYVDKFLDPPGFSSHQ                | -AVARTAGSVILRLSDSFFLPLKVS     | -DYS-ETLRSF               | ----                 | LQAAQQD                         | ----                | LGAL                 |                              |                            |                  |              |
| 1XJO                 | T                                 | ----                          | ALDRNSDAAAHAIWTLSSGTGEPT  | ----                 | -----                           | -----               | -----                |                              |                            |                  |              |
| 1RTQ                 | TGSHAKKFTQLGLAYAI                 | -EMGSATGDTPTPGNQ              | ----                      | -----                | -----                           | -----               | -----                |                              |                            |                  |              |
| Tfr1                 | -YKELIERIPELNKVAR                 | -AAAEVAGQFVIKLTHTHVELNLDYEEYN | -SQLLSFVRDLN              | ----                 | Q                               | ----                | YRAD                 |                              |                            |                  |              |
| Tfr2                 | -YENLHKVLQGRPLPAVAQVAQLAGQLLIRLSH | -DRLLPLDFGRYGDVVLRHIGNNLNEFS  | ----                      | ----                 | GD                              | -----               | -----                |                              |                            |                  |              |
|                      |                                   | 630                           | 640                       | 650                  |                                 | 660                 | 670                  | 680                          | 690                        |                  |              |
| <i>H. sapiens</i>    | -----                             | MKTYSVSFDSLFS                 | SAVKNFTEIASKF             | SERLODF              | -----                           | DKS                 | ----                 | NP                           | IVLRMMNDQLMFLERAFIDPLGLPDR | -PFYRHVIYAPS     |              |
| <i>S. scrofa</i>     | -----                             | MKAYSVSFDSLFS                 | SAVKNFTEIASNF             | SERVQDL              | -----                           | DKN                 | ----                 | NP                           | ILLRIMNDQLMFLERAFIVPLGLPDR | -AFYRHVIYAPS     |              |
| <i>M. musculus</i>   | -----                             | MEAYMISFDSLFS                 | SAVNNFTDVASKFN            | QRLQEL               | -----                           | DKS                 | ----                 | NP                           | ILLRIMNDQLMYLERAFIDPLGLPGR | -PFYRHIIYAPS     |              |
| <i>R. norvegicus</i> | -----                             | MKAYMISFDSLFS                 | SAVNNFTDVASKFN            | QRLQDL               | -----                           | DKS                 | ----                 | NP                           | ILLRILNDQLMYLERAFIDPLGLPGR | -PFYRHIIYAPS     |              |
| <i>D. rerio</i>      | -----                             | MQQYVVSFDSLFS                 | SAENFTVAARDFH             | QRLDQL               | -----                           | DSS                 | ----                 | NALAVRMVNDQLMYLERAFIDPLGLPGR | -PFYRHIIYAPS               |                  |              |
| <i>C. briggsae</i>   | -----                             | RTQYALLSKSSQD                 | LLVMSKKFQETM              | QFT                  | -----                           | FHSFSQNPY           | ----                 | DAKHVNAVNERLISTERC           | FINPRGVSKHNPSARHVLF        | SVS              |              |
| <i>A. thaliana</i>   | -----                             | VSTLIKSIEDL                   | STAAKHISLEK               | ----                 | -----                           | EAIK                | ----                 | GALKVRELNDRLMMAERAL          | TRDRDGLSER                 | -PWYKHLIYGPS     |              |
| <i>M. grisea</i>     | -----                             | LSPLSNAIAAF                   | ESAAEQIDALATQ             | ALSHNDT              | -----                           | VL                  | ----                 | LGVIN                        | SKYRDFNRYASQGALPGR         | -LTYNNVVSAPG     |              |
| <i>A. nidulans</i>   | -----                             | TFDFGPLYE                     | AISRLQKTAIEF              | DAYAADLTSQ           | TEELPWYLWKKVR                   | --LFFLIHEVNTKYKNI   | ERQFLY               | QOGLDGR                      | -SWFKHVVFAPG               |                  |              |
| <i>N. crassa</i>     | TSSTSKATVKA                       | FRDSFKRLHDAVDKLT              | TEKAARLDAAE               | DLRSQAREHIPWYHWHQKIK | --LGYQIRKVN                     | TKYKNIERSFLFSQGLDGR | -PWFKHVVFAPG         |                              |                            |                  |              |
| <i>G. zeae</i>       | -----                             | LEELDKAIET                    | FKKADEVKALEERARES         | DDE                  | -----                           | DLKKVVNHKYRDF       | QRFISQDGLPNR         | -DFYKHVVNAPG                 |                            |                  |              |
| NLD2                 | -----                             | LTDHGVSFDSLFS                 | SAVKNFSEASDF              | HKRLIQV              | -----                           | DLN                 | ----                 | NP                           | IARMMNDQLMLLERAFIDPLGLPGK  | -LFYRHIIYAPS     |              |
| NLDL                 | -----                             | LEQHSISLGPL                   | VTAVEKFEAEAAALGQR         | ISTL                 | -----                           | QKGSDF              | PLQVRMLNDQLMLLERTFLN | PRAFPEE                      | -RYYSHVLWAPS               |                  |              |
| Sgap                 | -----                             | -----                         | -----                     | -----                | -----                           | -----               | -----                | -----                        | -----                      |                  |              |
| AAP                  | -----                             | -----                         | -----                     | -----                | -----                           | -----               | -----                | -----                        | -----                      |                  |              |
| Tfr1                 | -----                             | IKEMGLSLQWLY                  | SARGDFFRATSRL             | TDFGNA               | -----                           | EKT                 | ----                 | DRFVMKKLND                   | RVMRVEYHFLSPYVSPKE         | -SPFRHVFWSG      |              |
| Tfr2                 | -----                             | LKARGLTLQWVY                  | SARGDYIRAAEKL             | RQEIYSS              | -----                           | EER                 | ----                 | DERLTRMYN                    | VRI                        | MRVEFYFLSQYVSPAD | -SPFRHIFMGRG |

|                      | 700                                | 710                      | 720                             | 730         | 740 | 750 |
|----------------------|------------------------------------|--------------------------|---------------------------------|-------------|-----|-----|
| <i>H. sapiens</i>    | SHNKYA                             | GESFPGIYDALFDIESKVDPSKAW | GEVKRQIYVAAFTVQAAAETLSEVA       |             |     |     |
| <i>S. scrofa</i>     | SHNKYM                             | GESFPGIYDALFDIENKVDPSKAW | GEVKRQISIAAFTVQAAAETLREVA       |             |     |     |
| <i>M. musculus</i>   | SHNKYA                             | GESFPGIYDALFDISSKVNASKAW | SEVKRQISIAAFTVQAAAETLMEVA       |             |     |     |
| <i>R. norvegicus</i> | SHNKYA                             | GESFPGIYDALFDINNVDTSKAW  | REVKRQISIAAFTVQAAAETLREVD       |             |     |     |
| <i>D. rerio</i>      | SHNKYA                             | GESFPGIYDALFDIENAAEPENAW | NEVKRQISIAAFTVNAAAETLKPVVSETKTS |             |     |     |
| <i>C. briggsae</i>   | DSDSYS                             | NSLMAGIQNAIHSYETS        | PSKKNLREIINOISTVQYSVICVVN       | TLRDVI      |     |     |
| <i>A. thaliana</i>   | KYDDYG                             | SKSFPGVDDAIDNAKKL-NTKASW | ENVQHQIWRVSRRAIRHASLVKLGELI     |             |     |     |
| <i>M. grisea</i>     | LDNGYG                             | ASVFPVAGDSLQGD           | R-ELADEWIVKSANAVLRAAEILTV       |             |     |     |
| <i>A. nidulans</i>   | LWTGYA                             | GATYPGIVESLE             | AGDV-ANAAKWQYIVIERVKAATELLQ     |             |     |     |
| <i>N. crassa</i>     | LWTGYS                             | GAVFPGLVESID             | ARDW-SNAERWVDIEACIKNAARKL       |             |     |     |
| <i>G. zeae</i>       | LDTGYA                             | AVTFPGITEGVLYAD          | KGNF-TLAQEWVGKTARGIVLAAKILKT    |             |     |     |
| NLD2                 | SHNKYA                             | GESFPGIYDAIFDIENKANSRLAW | KEVKKHIISIAAFTIQAAAETLKEVL      |             |     |     |
| NLDL                 | HGLR                               | SHIPGLSNACSRARDTASGSEAW  | AEVQRQLSIVVTALEGAAATLRPVADL     |             |     |     |
| 1XJO                 |                                    |                          |                                 |             |     |     |
| 1RTQ                 |                                    |                          |                                 |             |     |     |
| TfR1                 | SH                                 | TLPALLENL-KLRKQNGAFNE    | TLFRNQLALATWTIQGAANALS          | SGDVWDIDNEF |     |     |
| TfR2                 | DHTLGALLDHLRLLRSNSSGTPGATSSTGFOESR |                          | FRRLALLTWTIQGAANALS             | SGDVWNIDNN  |     |     |
